# Supplementary material for: High-Temperature Reactive Wetting of Natural Quartz by Liquid Magnesium
Source: MDPI journal article supplement (doi:10.3390/ma17061302), 2024-03-11
Supplement: s1 [file s1]

# High-Temperature Reactive Wetting of Natural Quartz by Liquid Magnesium

Azam Rasouli <sup>1,\*</sup>, Artur Kudyba <sup>2</sup>, Grzegorz Bruzda <sup>2</sup>, Jafar Safarian <sup>1</sup>, and Gabriella Tranell <sup>1</sup>

<sup>1</sup> Department of Materials Science and Engineering, Norwegian University of Science and Technology, Trondheim, Norway

<sup>2</sup> Łukasiewicz Research Network – Kraków Institute of Technology, Kraków, Poland

\* Correspondence: azam.rasouli@ntnu.no

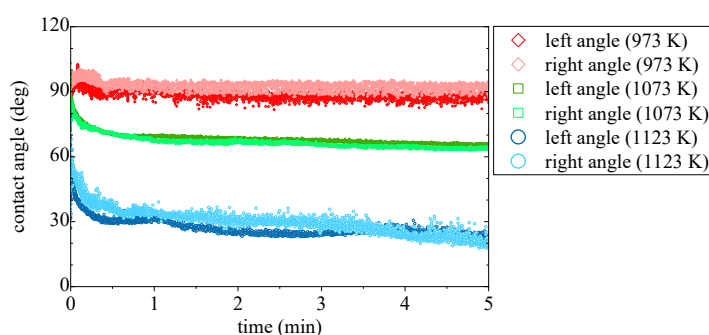

**Figure S1.** Variation of right and left contact angles with wetting time at 973 K, 1073 K, and 1123 K.

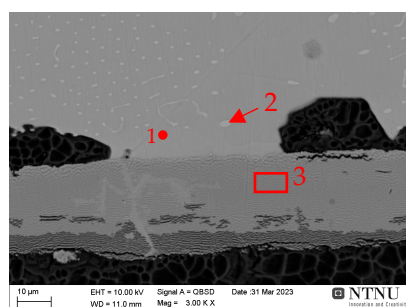

| point | Element concentration (at%) |        |       |
|-------|-----------------------------|--------|-------|
|       | Si                          | Mg     | O     |
| 1     | -                           | 100.00 | -     |
| 2     | 36.62                       | 63.11  | 0.26  |
| 3     | 3.6                         | 79.48  | 16.92 |

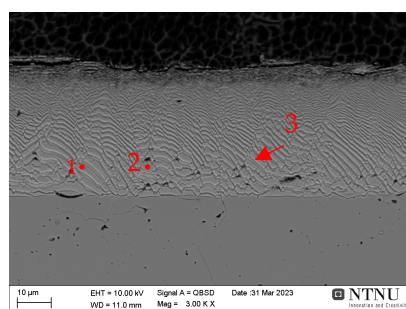

| point | Element noncentration (at%) |       |       |
|-------|-----------------------------|-------|-------|
|       | Si                          | Mg    | O     |
| 1     | 13.80                       | 61.59 | 24.61 |
| 2     | 15.62                       | 61.43 | 22.95 |
| 3     | 34.67                       | 59.65 | 5.67  |

**Figure S2.** EDX point analysis at 973 K.

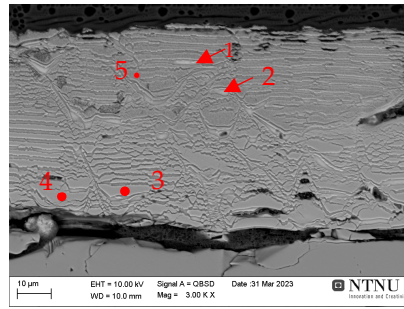

| point | Element concentration (at%) |       |       |
|-------|-----------------------------|-------|-------|
|       | Si                          | Mg    | O     |
| 1     | 38.70                       | 61.30 | -     |
| 2     | 37.55                       | 59.45 | 3.00  |
| 3     | 15.16                       | 62.30 | 22.54 |
| 4     | 18.224                      | 61.87 | 19.89 |
| 5     | 4.58                        | 71.12 | 23.30 |

**Figure S3.** EDX point analysis at 1073 K.

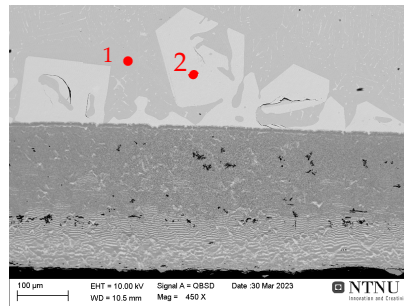

| point | Element concentration (at%) |       |      |
|-------|-----------------------------|-------|------|
|       | Si                          | Mg    | O    |
| 1     | -                           | 99.97 | 0.03 |
| 2     | 38.28                       | 61.72 | -    |

**Figure S4.** EDX point analysis at 1123 K.

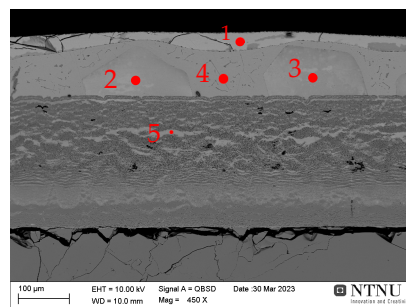

| point | Element concentration (at%) |        |      |
|-------|-----------------------------|--------|------|
|       | Si                          | Mg     | O    |
| 1     | 38.63                       | 61.37  | -    |
| 2     | 38.95                       | 59.82  | 1.23 |
| 3     | 39.58                       | 60.42  | -    |
| 4     | -                           | 100.00 | -    |
| 5     | 38.96                       | 58.29  | 2.75 |

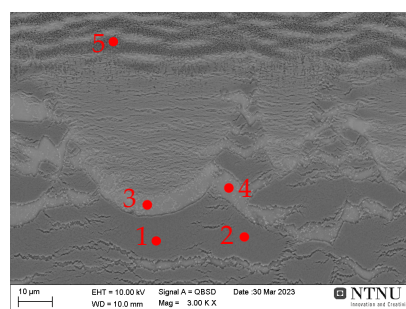

| point | Element concentration (at%) |       |       |
|-------|-----------------------------|-------|-------|
|       | Si                          | Mg    | O     |
| 1     | 14.73                       | 62.45 | 22.82 |
| 2     | 15.08                       | 62.23 | 22.68 |
| 3     | 38.41                       | 57.62 | 3.97  |
| 4     | 37.78                       | 55.87 | 6.35  |
| 5     | 4.58                        | 70.18 | 25.24 |

**Figure S5.** EDX point analysis at 1173 K.
